# Supplementary material for: The influence of hydrogen bonds on NIAD-4 for use in the optical imaging of amyloid fibrils
Source: Royal Society of Chemistry journal article supplement (doi:10.1039/c7cp02268a), 2017-01-01
Supplement: c7cp02268a1.pdf [file c7cp02268a1.pdf]

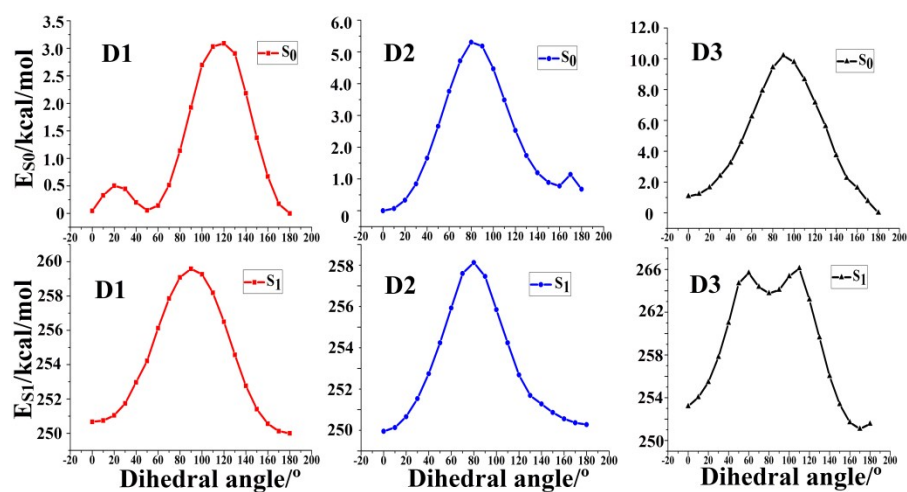

Figure 1: Potential energies curves of S<sub>0</sub> and S<sub>1</sub> states of n-butanol-NIAD-4 with three dihedral angles increase.
